# Supplementary material for: Puumala Orthohantavirus Reassortant Genome Variants Likely Emerging in the Watershed Forests
Source: MDPI journal article supplement (doi:10.3390/ijms24021018), 2023-01-05
Supplement: s1 [file s1]

## Supplement

Table S1. Primers used for the RT-PCR amplification and sequencing

| Primer designation | Nucleotide sequence,<br>5' → 3' | Location <sup>a</sup> | Reference  |
|--------------------|---------------------------------|-----------------------|------------|
| Forward            |                                 |                       |            |
| PuuV-S-F1          | tagtagtagactccttgaagc           | 1-23                  | [1]        |
| PuuV-S-F41         | agctactacgagaacaactgg           | 21-41                 | [1]        |
| PuuV-For           | ctgcaagccaggcaacaacagtgtcagca   | 172-201               | [2]        |
| 4S-F3              | gcaatggaggataaactcgc            | 199-218               | [1]        |
| 39S-F3             | ggccaaaacatctatatgtatcc         | 560-582               | This paper |
| PUUV-S-F704        | aacatcatgagtccagtaatggg         | 682-704               | [1]        |
| PUUV-S-F763        | cagagagaattagggagtattatgg       | 740-763               | This paper |
| PUUV-S-F991        | ggtatttgctgtgcaccag             | 972-991               | This paper |
| 69S-F3             | ttatggcatctaaaactgtgg           | 1079-1099             | [1]        |
| Reverse            |                                 |                       |            |
| PUUV-S-R228        | acagcatctgccattcttctc           | 228-248               | This paper |
| 4S-B3              | gtgaaccctattacatagactcc         | 409-431               | This paper |
| 32S-B3             | attgatctctcaaatgatgtgt          | 527-549               | This paper |
| 5S-B3              | ggccagtctttaagcaagaaag          | 719-740               | [1]        |
| PuuV-Rev           | gtctgccacatgattttgtcaagcacatc   | 865-894               | [2]        |
| PuuV-S-R972        | tctggtgcacaggcaaatacc           | 972-992               | This paper |
| 69S-B3             | gatatctctttaccttctggtc          | 1297-1319             | This paper |
| PuuV-S-R1496       | gtataattccagttaaccctg           | 1496-1517             | [1]        |
| M segment          |                                 |                       |            |
| Forward            |                                 |                       |            |
| F1452-PuuV-M       | tctttaatcccaggagttgc            | 1351-1470             | [3]        |
| 1M-F3              | ggtatatgagcctatgcaagg           | 1888-1907             | This paper |
| F2143-PuuM         | acagaatccagctaataaacaag         | 2143-2165             | This paper |

| Reverse      |                        |           |            |
|--------------|------------------------|-----------|------------|
| 1M-B3        | gctgtctcctatatgtatagct | 2120-2141 | This paper |
| PUUV-M-R2359 | caatcaggtgggttacadccc  | 2359-2379 | This paper |
| R2582 PUUV-M | aaattgtccctattaaacacac | 2561-2582 | [3]        |

<sup>a</sup> Numbering corresponds to the position of nucleotide (nt) sequences on the PUUV strain Puu/Kazan used for comparison (Genbank Accession No Z84204 and Z84205 for S and M segment, respectively).

Table S2. List of the *Puumala orthohantavirus* (PUUV) sequences used for phylogenetic analysis as references

| Strain sequence                                  | Short name | GenBank<br>Accession No |
|--------------------------------------------------|------------|-------------------------|
| PUUV/Observatory/MG_118/2015/segment S           | MG118      | MW587801                |
| PUUV/Nizhnekamsk/MG_134/2015/segment S           | MG134      | MW504222                |
| PUUV/Naberezhnye Chelny/MG_260/2015/segment S    | MG260      | MW504226                |
| PUUV/Lesnye Morkvashi/MG_794/2017/segment S      | MG794      | MW587803                |
| PUUV/Laishevo/MG_809/2017/segment S              | MG809      | MW504247                |
| PUUV/Kazan/MG_845/2017/segment S                 | MG845      | MW587804                |
| PUUV/Mamadysh/MG_980/2017/segment S              | MG980      | MW504250                |
| PUUV/Pestretsy/MG_1131/2017/segment S            | MG1131     | MW504251                |
| PUUV/Almetievsk/MG_1182/2018/segment S           | MG1182     | MW504212                |
| PUUV/Teteevo/MG_1041/2017/segment S              | MG1152     | MZ441151                |
| PUUV/Tatarskoe Utiashkino/MG_1419/2019/segment S | MG1419     | MW504213                |
| PUUV/Kurkul/MG_1459/2019/segment S               | MG1459     | MW504214                |
| PUUV/Oktiabrino/MG_1469/2019/segment S           | MG1469     | MW504215                |
| PUUV/Starye Salmany/MG_1586/2019/segment S       | MG1586     | MW504217                |
| PUUV/Vysokaya Gora/MG_066/2015/segment S         | MG066      | MZ913276                |
| Puu/Kazan                                        | Kazan      | Z84204                  |
| Samara_49/CG/2005                                | Samara     | AB433843                |

|                                                 |         |           |
|-------------------------------------------------|---------|-----------|
| DTK/Ufa-97                                      | Ufa     | AB297665  |
| Sotkamo 2009                                    | Sotkamo | HE801633  |
| Tula virus                                      | Tula    | EU439951  |
| PUUV/Vysokogorsky/MG_066/2015/segment M         | MG066   | MZ913287  |
| PUUV/Observatory/MG_118/2015/segment M          | MG118   | MZ913288  |
| PUUV/Nizhnekamsky/MG_134/2015/segment M         | MG134   | MT495345  |
| PUUV/Tukaevsky/MG_260/2015/segment M            | MG260   | MT495349  |
| Lesnye Morkvashi/MG_794/2017/segment M          | MG794   | MZ913289  |
| PUUV/Laishevo/MG_809/2017/segment M             | MG809   | MT495353  |
| PUUV/Kazan/MG_845/2017/segment M                | MG845   | MT495325  |
| PUUV/Mamadysh/MG_980/2017/segment M             | MG980   | MT495336  |
| PUUV/Pestretsy/MG_1131/2017/segment M           | MG1131  | MT495343  |
| PUUV/Almetievsk/MG_1182/2018/segment M          | MG1182  | MW498171  |
| PUUV/Teteevo/MG_1041/2017/segment M             | MG1152  | MT495338  |
| PUUV/Tatarskoe Utashkino/MG_1419/2019/segment M | MG1419  | MW498179  |
| PUUV/Kurkul/MG_1459/2019/segment M              | MG1459  | MW498180  |
| PUUV/Oktiabrino/MG_1469/2019/segment M          | MG1469  | MW498181  |
| PUUV/Starye Salmany/MG_1586/2019/segment M      | MG1586  | MW498185  |
| Puu/Kazan                                       | Kazan   | Z84205    |
| Samara_49/CG/2005                               | Samara  | AB433850  |
| DTK/Ufa-97                                      | Ufa     | AB297666  |
| Sotkamo 2009                                    | Sotkamo | HE801634  |
| Tula virus                                      | Tula    | NC_005228 |

Table S3. List of the obtained PUUV strains and GenBank accession No of S and M segment sequences.

| Strain | Short | Segment | Accession No |
|--------|-------|---------|--------------|
|--------|-------|---------|--------------|

|                             | name  |                 |          |
|-----------------------------|-------|-----------------|----------|
| S segment                   |       |                 |          |
| PUUV/Kazan/human_RT461/2019 | Hu461 | S, complete CDS | MW587793 |
| PUUV/Kazan/human_RT464/2019 | Hu464 | S, complete CDS | MZ913278 |
| PUUV/Kazan/human_RT466/2019 | Hu466 | S, complete CDS | MZ913279 |
| PUUV/Kazan/human_RT475/2019 | Hu475 | S, complete CDS | MZ913280 |
| PUUV/Kazan/human_RT488/2019 | Hu488 | S, complete CDS | MW587794 |
| PUUV/Kazan/human_RT493/2019 | Hu493 | S, complete CDS | MW587795 |
| PUUV/Kazan/human_RT497/2019 | Hu497 | S, complete CDS | MW587796 |
| PUUV/Kazan/human_RT505/2019 | Hu505 | S, complete CDS | MW587797 |
| PUUV/Kazan/human_RT523/2019 | Hu523 | S, complete CDS | MZ913281 |
| PUUV/Kazan/human_RT550/2019 | Hu550 | S, complete CDS | MZ913282 |
| PUUV/Kazan/human_RT604/2019 | Hu604 | S, complete CDS | MZ913285 |
| PUUV/Kazan/human_RT638/2019 | Hu638 | S, complete CDS | MZ913286 |
| PUUV/Kazan/human_RT587/2019 | Hu587 | S, partial CDS  | OP459283 |
| PUUV/Kazan/human_RT633/2019 | Hu633 | S, partial CDS  | OP459293 |
| PUUV/Kazan/human_RT463/2019 | Hu463 | S, partial CDS  | OP459273 |
| PUUV/Kazan/human_RT471/2019 | Hu471 | S, partial CDS  | OP459274 |
| PUUV/Kazan/human_RT474/2019 | Hu474 | S, partial CDS  | MW587807 |
| PUUV/Kazan/human_RT487/2019 | Hu487 | S, partial CDS  | OP459275 |
| PUUV/Kazan/human_RT500/2019 | Hu500 | S, complete CDS | OP459276 |
| PUUV/Kazan/human_RT510/2019 | Hu510 | S, partial CDS  | OP459277 |
| PUUV/Kazan/human_RT518/2019 | Hu518 | S, complete CDS | MW587798 |
| PUUV/Kazan/human_RT520/2019 | Hu520 | S, complete CDS | MW587799 |
| PUUV/Kazan/human_RT526/2019 | Hu526 | S, partial CDS  | MW587809 |
| PUUV/Kazan/human_RT542/2019 | Hu542 | S, partial CDS  | OP459295 |
| PUUV/Kazan/human_RT545/2019 | Hu545 | S, partial CDS  | MW587810 |
| PUUV/Kazan/human_RT546/2019 | Hu546 | S, complete CDS | MW587800 |
| PUUV/Kazan/human_RT549/2019 | Hu549 | S, partial CDS  | OP459278 |

|                             |       |                 |          |
|-----------------------------|-------|-----------------|----------|
| PUUV/Kazan/human_RT566/2019 | Hu566 | S, partial CDS  | OP459279 |
| PUUV/Kazan/human_RT574/2019 | Hu574 | S, partial CDS  | MW587800 |
| PUUV/Kazan/human_RT577/2019 | Hu577 | S, partial CDS  | OP459280 |
| PUUV/Kazan/human_RT578/2019 | Hu578 | S, partial CDS  | OP459281 |
| PUUV/Kazan/human_RT584/2019 | Hu584 | S, partial CDS  | OP459282 |
| PUUV/Kazan/human_RT593/2019 | Hu593 | S, partial CDS  | OP459284 |
| PUUV/Kazan/human_RT598/2019 | Hu598 | S, partial CDS  | OP459285 |
| PUUV/Kazan/human_RT599/2019 | Hu599 | S, partial CDS  | OP459286 |
| PUUV/Kazan/human_RT602/2019 | Hu602 | S, partial CDS  | OP459287 |
| PUUV/Kazan/human_RT603/2019 | Hu603 | S, partial CDS  | OP459288 |
| PUUV/Kazan/human_RT608/2019 | Hu608 | S, partial CDS  | OP459289 |
| PUUV/Kazan/human_RT611/2019 | Hu611 | S, partial CDS  | OP459290 |
| PUUV/Kazan/human_RT614/2019 | Hu614 | S, complete CDS | OP459291 |
| PUUV/Kazan/human_RT624/2019 | Hu624 | S, partial CDS  | OP459292 |
| PUUV/Kazan/human_RT639/2019 | Hu639 | S, complete CDS | OP459294 |
| <b>M segment</b>            |       |                 |          |
| PUUV/Kazan/human_RT461/2019 | Hu461 | M, partial CDS  | MZ913292 |
| PUUV/Kazan/human_RT464/2019 | Hu464 | M, partial CDS  | MZ913293 |
| PUUV/Kazan/human_RT466/2019 | Hu466 | M, partial CDS  | MZ913294 |
| PUUV/Kazan/human_RT475/2019 | Hu475 | M, partial CDS  | MZ913295 |
| PUUV/Kazan/human_RT488/2019 | Hu488 | M, partial CDS  | MZ913296 |
| PUUV/Kazan/human_RT493/2019 | Hu493 | M, partial CDS  | MZ913297 |
| PUUV/Kazan/human_RT497/2019 | Hu497 | M, partial CDS  | MZ913298 |
| PUUV/Kazan/human_RT505/2019 | Hu505 | M, partial CDS  | MZ913299 |
| PUUV/Kazan/human_RT523/2019 | Hu523 | M, partial CDS  | MZ913300 |
| PUUV/Kazan/human_RT550/2019 | Hu550 | M, partial CDS  | MZ913301 |
| PUUV/Kazan/human_RT604/2019 | Hu604 | M, partial CDS  | MZ913304 |
| PUUV/Kazan/human_RT638/2019 | Hu638 | M, partial CDS  | MZ913305 |
| PUUV/Kazan/human_RT463/2019 | Hu463 | M, partial CDS  | OP441075 |

|                             |       |                |          |
|-----------------------------|-------|----------------|----------|
| PUUV/Kazan/human_RT500/2019 | Hu500 | M, partial CDS | OP441076 |
| PUUV/Kazan/human_RT510/2019 | Hu510 | M, partial CDS | OP484977 |
| PUUV/Kazan/human_RT526/2019 | Hu526 | M, partial CDS | OP441077 |
| PUUV/Kazan/human_RT549/2019 | Hu549 | M, partial CDS | OP441078 |
| PUUV/Kazan/human_RT587/2019 | Hu587 | M, partial CDS | OP441079 |
| PUUV/Kazan/human_RT599/2019 | Hu599 | M, partial CDS | OP441080 |
| PUUV/Kazan/human_RT602/2019 | Hu602 | M, partial CDS | OP441081 |
| PUUV/Kazan/human_RT603/2019 | Hu603 | M, partial CDS | OP441082 |
| PUUV/Kazan/human_RT611/2019 | Hu611 | M, partial CDS | OP484974 |
| PUUV/Kazan/human_RT624/2019 | Hu624 | M, partial CDS | OP484975 |
| PUUV/Kazan/human_RT633/2019 | Hu633 | M, partial CDS | OP484976 |

Table S4. Values of the identity of the S segment nt sequence between groups of PUUV strains identified in hemorrhagic fever with renal syndrome (HFRS) patients, %

| Group/<br>subgroup | A1         | A2        | B         | C1         | C2        | D         | E          |
|--------------------|------------|-----------|-----------|------------|-----------|-----------|------------|
| A1                 | 99.4-100.0 | 97.0-98.1 | 95.3-98.1 | 92.5-94.7  | 94.3-94.9 | 92.5-94.6 | 93.8-95.3  |
| A2                 |            | 99.1-99.9 | 95.6-98.1 | 91.9-94.7  | 93.9-95.0 | 93.4-94.5 | 93.4-95.0  |
| B                  |            |           | 97.7-99.9 | 91.9-94.4  | 94.1-95.3 | 90.6-94.7 | 91.2-95.0  |
| C1                 |            |           |           | 98.4-100.0 | 97.4-97.8 | 91.9-95.1 | 93.4-97.5  |
| C2                 |            |           |           |            | 100.0     | 94.2-95.7 | 93.6-96.1  |
| D                  |            |           |           |            |           | 97.9-99.0 | 93.1-95.3  |
| E                  |            |           |           |            |           |           | 96.2-100.0 |

Table S5. Values of the identity of the M segment nt sequence between groups of PUUV strains identified in HFRS patients, %

| Group | A1        | A2         | B          | C         | D         | E          |
|-------|-----------|------------|------------|-----------|-----------|------------|
| A1    | 97.9-99.7 | 96.6-97.3  | 91.0-92.0  | 92.0-93.2 | 92.5-93.2 | 91.2-92.6  |
| A2    |           | 99.8-100.0 | 91.2-91.6  | 90.7-91.8 | 92.0-92.4 | 90.5-91.6  |
| B     |           |            | 98.8-100.0 | 95.7-97.1 | 91.4-92.2 | 91.0-91.8  |
| C     |           |            |            | 98.7-99.5 | 92.0-93.2 | 90.7-92.2  |
| D     |           |            |            |           | 98.1      | 92.0-93.0  |
| E     |           |            |            |           |           | 96.9-100.0 |

## Reference

1. Davidyuk, Y.; Shamsutdinov, A.; Kabwe, E.; Ismagilova, R.; Martynova, E.; Belyaev, A.; Shuralev, E.; Trifonov, V.; Savitskaya, T.; Isaeva, G., et al. Prevalence of the Puumala orthohantavirus Strains in the Pre-Kama Area of the Republic of Tatarstan, Russia. *Pathogens* **2020**, *9*, doi:10.3390/pathogens9070540.
2. Kariwa, H.; Tkachenko, E.A.; Morozov, V.G.; Seto, T.; Tanikawa, Y.; Kolominov, S.I.; Belov, S.N.; Nakamura, I.; Hashimoto, N.; Balakiev, A.E., et al. Epidemiological study of hantavirus infection in the Samara Region of European Russia. *The Journal of veterinary medical science* **2009**, *71*, 1569-1578, doi:10.1292/jvms.001569.
3. Kabwe, E., Davidyuk, Y.N. and Morzunov, S.P. Genome variations of Puumala virus strains circulating in Nizhnekamsky and Tukaevsky districts of the Republic of Tatarstan. *Uchenye Zapiski Kazanskogo Universiteta. Seriya Estestvennye Nauki* **2018**, *160*, 373-385.
